# Supplementary material for: Smoking and Provision of Smoking Cessation Interventions among Inpatients with Acute Coronary Syndrome in China: Findings from the Improving Care for Cardiovascular Disease in China-Acute Coronary Syndrome Project
Source: PubMed Central journal article supplement (PMC7583717; doi:10.5334/gh.784), 2020-10-23
Supplement: gh-15-1-784-s1.pdf [file gh-15-1-784-s1.pdf]

## Supplementary Files

|                                                                                                                                                                |           |
|----------------------------------------------------------------------------------------------------------------------------------------------------------------|-----------|
| Supplementary Methods .....                                                                                                                                    | 2         |
| <b>Supplementary Tables</b> .....                                                                                                                              | <b>5</b>  |
| Supplementary Table 1 Adjusted factors for the association between smoking status and critical cardiac symptoms at admission and in-hospital outcomes .....    | 5         |
| Supplementary Table 2 Missing rates of each variable and management of missing data (variables without any missing were not list in the following table) ..... | 6         |
| Supplementary Table 3 Smoking prevalence of ACS patients by sex .....                                                                                          | 9         |
| Supplementary Table 4 Proportion of receiving smoking cessation interventions among smoking ACS patients .....                                                 | 10        |
| Supplementary Table 5 Investigators of CCC-ACS project .....                                                                                                   | 11        |
| <b>Supplementary Figures</b> .....                                                                                                                             | <b>31</b> |
| Supplementary Figure 1 Comparison of age-standardized smoking prevalence between ACS patients and the general population by sex .....                          | 31        |
| Supplementary Figure 2 Trends in smoking prevalence among ACS patients .....                                                                                   | 32        |
| Supplementary Figure 3 In-hospital outcomes of smokers and non-smokers among patients with ACS (overall), STEMI, and NSTEMI-ACS .....                          | 33        |
| Supplementary Figure 4 Trends in proportions of patients receiving different smoking cessation interventions .....                                             | 34        |
| <b>Supplementary References</b> .....                                                                                                                          | <b>35</b> |

1 **Supplementary Methods**

2 **Data collection**

3 Data elements collected in this study included patients' demographics, medical history,  
4 symptoms on arrival, in-hospital treatments and procedures, discharge medications, and  
5 secondary prevention strategies. Eligible patients were consecutively reported to the online  
6 data reporting system for each month before the middle of the following month. Data  
7 accuracy and completeness are ensured by multiple strategies. Regular on-site quality audits  
8 by third-party clinical research associates were performed to ensure data accuracy. Around 5%  
9 of reported cases are randomly selected and compared with the original medical records.  
10 According to the quality audit reports, the data in this study were appropriately reported with  
11 an accuracy rate greater than 95%. The quality audit reports were also fed back to each center  
12 regularly to ensure data quality. A standardized online reporting tool with automatic checks  
13 for invalid values was used to ensure data completeness. Inconsistent or out-of-range data are  
14 checked to prompt the user to correct or review data entries. Also, data quality is monitored  
15 monthly and reports are sent to hospitals to ensure data completeness.

16

17 **Study variables**

18 ***Definition of acute coronary syndrome (ACS)***

19 ACS, including ST-elevation myocardial infarction (STEMI) and non-ST-elevation acute  
20 coronary syndrome (NSTEMI-ACS), was initially identified based on the principal diagnosis at  
21 discharge obtained by reviewing the inpatient list for STEMI, non-ST-elevation myocardial  
22 infarction and unstable angina. The diagnostic criteria for ACS were based on chest pain,

1 ECG, and measurements of myocardial injury biomarkers, and were consistent with the  
2 definitions of STEMI and NSTEMI-ACS in the American College of Cardiology/American  
3 Heart Association (ACC/AHA) guidelines and the European Society of Cardiology (ESC)  
4 guidelines [1-4].

5 ***Definition of other variables***

6 Patients with hypertension were defined as those with a prior history of hypertension,  
7 receiving antihypertensive therapy, or with a systolic blood pressure of  $\geq 140$  mmHg or  
8 diastolic blood pressure of  $\geq 90$  mmHg on admission. Patients with diabetes mellitus were  
9 defined as those having a previous or new diagnosis of diabetes mellitus, receiving  
10 anti-diabetic treatment, or having a fasting blood glucose level of  $\geq 7.0$  mmol/L (126 mg/dL)  
11 or hemoglobin A1c level of  $\geq 6.5\%$ . Patients with elevated low-density lipoprotein cholesterol  
12 (LDL-C) were those with a serum LDL-C level of  $\geq 2.6$  mmol/L (100 mg/dL). The cutoff for  
13 low high-density lipoprotein cholesterol (HDL-C) was defined as a serum HDL-C  
14 concentration of  $< 1.0$  mmol/L (40 mg/dL). Elevated triglyceride (TG) was defined as a serum  
15 TG concentration of  $\geq 2.3$  mmol/L (200mg/dl). Estimated glomerular filtration rate (eGFR)  
16 was calculated using the equation developed by the Chronic Kidney Disease Epidemiology  
17 Collaboration [5]. Patients with renal insufficiency were defined as those with eGFR  $< 90$   
18 mL/min per  $1.73 \text{ m}^2$  and a history of renal failure. A history of ACS was specified if the  
19 patient had a history of myocardial infarction or had undergone percutaneous coronary  
20 intervention or coronary artery bypass grafting before the current hospitalization episode.  
21 Patient history of other conditions, including heart failure, atrial fibrillation, cerebrovascular  
22 disease, renal failure, and family history of coronary heart disease was defined according to

1 notes obtained from patients' original medical records. The definition of substantially  
2 elevated myocardial injury markers was elevation of cardiac injury markers beyond five  
3 times the upper reference limit [4]. Patients with triple-vessel disease were defined as those  
4 with stenosis of  $\geq 50\%$  in all three main epicardial coronary arteries, including left anterior  
5 descending, left circumflex, and right coronary artery (diagnosed by angiography). According  
6 to the Chinese Guidelines for the Diagnosis and Treatment of Heart Failure 2014 [6], patients  
7 with Killip class II-III were classified as acute heart failure and patients with Killip class IV  
8 were classified as cardiogenic shock in clinical practice. Patients' transfer status indicated  
9 whether they had been transferred from another hospital.

10

#### 11 **Statistical analysis**

12 We compared the characteristics of smokers and non-smokers. Categorical variables were  
13 presented as percentage of the total sample (and numbers of patients) by group and  
14 differences between groups were compared using Pearson's chi-square test. Means (and  
15 standard deviations) were presented for continuous variables with normal distributions, and  
16 differences between groups were compared using t-tests.

## Supplementary Tables

Supplementary Table 1 Adjusted factors for the association between smoking status and critical cardiac symptoms at admission and in-hospital outcomes

|                                        | Adjusted factors                                                                                                                                                                                                                                                                                                                                                                                                                                                     |
|----------------------------------------|----------------------------------------------------------------------------------------------------------------------------------------------------------------------------------------------------------------------------------------------------------------------------------------------------------------------------------------------------------------------------------------------------------------------------------------------------------------------|
| Critical cardiac symptoms at admission | Age, sex, smoke, hypertension, diabetes mellitus, heart rate, history of ACS, history of heart failure, history of atrial fibrillation, history of cerebrovascular disease, history of renal failure, pre-hospital statin treatment, pre-hospital ACEI/ARB treatment, pre-hospital beta-blocker treatment, type of ACS                                                                                                                                               |
| In-hospital outcomes                   | Age, sex, smoke, diabetes mellitus, elevated LDL-C, systolic blood pressure, heart rate, history of ACS, history of heart failure, history of cerebrovascular disease, type of ACS, renal insufficiency, triple-vessel disease, cardiac arrest at admission, substantially elevated myocardial injury markers and Killip class at admission, DAPT at arrival, statins at arrival, ACEI/ARB at arrival, beta-blocker at arrival, PCI, hospital level, transfer status |

ACEI: angiotensin-converting enzyme inhibitor; ACS: acute coronary syndrome; ARB: angiotensin-receptor blocker; DAPT: dual antiplatelet therapy; LDL-C: low-density lipoprotein cholesterol; PCI: percutaneous coronary intervention

Supplementary Table 2 Missing rates of each variable and management of missing data (variables without any missing were not list in the following table)

| Variables                | Missing, N (%)      |                        | Management of missing data                                                                                                  |
|--------------------------|---------------------|------------------------|-----------------------------------------------------------------------------------------------------------------------------|
|                          | STEMI<br>(n=55,575) | NSTE-ACS<br>(n=36,934) |                                                                                                                             |
| Age                      | 184 (0.33%)         | 148 (0.40%)            | Patients with missing values were imputed using multiple imputation with chained equations implemented by IVEware software. |
| Sex                      | 3 (0.01%)           | 2 (0.01%)              |                                                                                                                             |
| Systolic blood pressure  | 117 (0.21%)         | 43 (0.12%)             |                                                                                                                             |
| Diastolic blood pressure | 133 (0.24%)         | 64 (0.17%)             |                                                                                                                             |
| Heart rate               | 146 (0.26%)         | 73 (0.20%)             |                                                                                                                             |
| LDL-C                    | 5,957 (10.72%)      | 3,534 (9.57%)          |                                                                                                                             |
| HDL-C                    | 5,789 (10.42%)      | 3,445 (9.33%)          |                                                                                                                             |
| TG                       | 5,565 (10.01%)      | 3,390 (9.18%)          |                                                                                                                             |
| Serum creatinine         | 1,969 (3.54%)       | 1,498 (4.06%)          |                                                                                                                             |
| Fasting blood glucose    | 7,126 (12.82%)      | 4,908 (13.29%)         |                                                                                                                             |

|                                                  |               |             |
|--------------------------------------------------|---------------|-------------|
| Cardiac arrest at admission                      | 555 (1.00%)   | 274 (0.74%) |
| Substantially elevated myocardial injury markers | 1,058 (1.90%) | 959 (2.60%) |

---

|                                  |             |             |
|----------------------------------|-------------|-------------|
| Acute heart failure at admission | 538 (0.97%) | 250 (0.68%) |
|----------------------------------|-------------|-------------|

|                                |             |             |
|--------------------------------|-------------|-------------|
| Cardiogenic shock at admission | 515 (0.93%) | 248 (0.67%) |
|--------------------------------|-------------|-------------|

Patients with unclear status for acute heart failure and cardiogenic shock were imputed by Killip class. Patients with Killip class II-III were classified as acute heart failure and patients with Killip class IV were classified as cardiogenic shock. If patients with unclear status of Killip class, we imputed the missing values using multiple imputation with chained equations implemented by IVEware software.

---

|              |              |               |
|--------------|--------------|---------------|
| Killip class | 4180 (7.52%) | 9353 (25.32%) |
|--------------|--------------|---------------|

Patients with unclear status for Killip class were imputed based on the status of acute heart failure or cardiogenic shock at admission. Patients with acute heart failure were identified as Killip class II-III and patients with cardiogenic shock were identified as Killip class IV. Patients without both of acute heart failure and cardiogenic shock were identified as Killip class I. If patients with

---

unclear status of acute heart failure or cardiogenic shock, we imputed the missing values using multiple imputation with chained equations implemented by IVEware software.

---

HDL-C: high-density lipoprotein cholesterol; LDL-C: low-density lipoprotein cholesterol; NSTEMI: non-ST-elevation acute coronary syndrome; STEMI: ST-elevation myocardial infarction; TG: triglyceride



Supplementary Table 3 Smoking prevalence of ACS patients by sex

|                         | Men<br>(N=68,371)    | Women<br>(N=24,138) |
|-------------------------|----------------------|---------------------|
| Overall, % (n/N)        | 52.4 (35,813/68,371) | 8.0 (1,937/24,138)  |
| Age (years), % (n/N)    |                      |                     |
| <45                     | 68.0 (4,310/6,336)   | 14.9 (57/382)       |
| 45-54                   | 63.7 (9,631/15,114)  | 10.6 (219/2,062)    |
| 55-64                   | 57.0 (11,405/20,023) | 8.9 (508/5,724)     |
| 65-74                   | 44.6 (7,294/16,362)  | 7.2 (580/8,112)     |
| ≥75                     | 30.1 (3,173/10,536)  | 7.3 (573/7,858)     |
| History of ACS, % (n/N) |                      |                     |
| Yes                     | 40.2 (3,276/8,153)   | 5.9 (151/2,573)     |
| No                      | 54.0 (32,537/60,218) | 8.3 (1,786/21,565)  |

ACS: acute coronary syndrome

Supplementary Table 4 Proportion of receiving smoking cessation interventions among smoking ACS patients

|                            | Total<br>(N=37,336)     | Men<br>(N=35,441)       | Women<br>(N=1,895) |
|----------------------------|-------------------------|-------------------------|--------------------|
| Overall, % (n/N)           | 35.3<br>(13,161/37,336) | 35.6<br>(12,617/35,441) | 28.7 (544/1,895)   |
| Age (years), % (n/N)       |                         |                         |                    |
| <45                        | 36.0 (1,566/4,349)      | 36.1 (1,550/4,292)      | 28.1 (16/57)       |
| 45-54                      | 35.4 (3,464/9,796)      | 35.5 (3,401/9,579)      | 29.0 (63/217)      |
| 55-64                      | 35.3 (4,173/11,825)     | 35.7 (4,042/11,321)     | 26.0 (131/504)     |
| 65-74                      | 35.4 (2,738/7,741)      | 35.7 (2,562/7,171)      | 30.9 (176/570)     |
| ≥75                        | 33.7 (1,220/3,625)      | 34.5 (1,062/3,078)      | 28.9 (158/547)     |
| History of ACS, %<br>(n/N) |                         |                         |                    |
| Yes                        | 31.8 (1,071/3,372)      | 32.0 (1,032/3,226)      | 26.7 (39/146)      |
| No                         | 35.6<br>(12,090/33,964) | 36.0<br>(11,585/32,215) | 28.9 (505/1,749)   |
| Types of ACS, % (n/N)      |                         |                         |                    |
| STEMI                      | 35.5 (8,978/25,268)     | 35.9 (8,648/24,063)     | 27.4 (330/1,205)   |
| NSTE-ACS                   | 34.7 (4,183/12,068)     | 34.9 (3,969/11,378)     | 31.0 (214/690)     |

ACS: acute coronary syndrome; NSTE-ACS: non-ST-elevation acute coronary syndrome;

STEMI: ST-elevation myocardial infarction

Supplementary Table 5 Investigators of CCC-ACS project

| <b>ID</b> | <b>Hospitals</b>                                                                          | <b>Territories</b> | <b>Provinces</b> | <b>City</b> | <b>Investigator</b> |
|-----------|-------------------------------------------------------------------------------------------|--------------------|------------------|-------------|---------------------|
| 1         | Shanxi Cardiovascular Hospital                                                            | Northern China     | Shanxi           | Taiyuan     | Bao Li              |
| 2         | Nanjing Drum Tower Hospital, The Affiliated Hospital of Nanjing University Medical School | Eastern China      | Jiangsu          | Nanjing     | Biao Xu             |
| 3         | Hainan General Hospital                                                                   | Southern China     | Hainan           | Haikou      | Bin Li              |
| 4         | The Second Hospital of Jilin University                                                   | Northeast China    | Jilin            | Changchun   | Bin Liu             |
| 5         | The 2nd Affiliated Hospital of Harbin Medical University                                  | Northeast China    | Heilongjiang     | Harbin      | Bo Yu               |
| 6         | The Ninth Hospital Affiliated to Shanghai Jiaotong University School of Medicine          | Eastern China      | Shanghai         | Shanghai    | Changqian Wang      |
| 7         | Henan Provincial People's Hospital                                                        | Central China      | Henan            | Zhengzhou   | Chuanyu Gao         |
| 8         | Shanxi Provincial People's Hospital                                                       | Northern China     | Shanxi           | Taiyuan     | Chunlin Lai         |
| 9         | Xinqiao Hospital, Third Military Medical University                                       | Southwest China    | Chongqing        | Chongqing   | Cui Bin, Lan Huang  |
| 10        | China Meitan General Hospital                                                             | Northern China     | Beijing          | Beijing     | Di Wu               |

|    |                                                                     |                 |           |           |                          |
|----|---------------------------------------------------------------------|-----------------|-----------|-----------|--------------------------|
| 11 | The 309th Hospital of Chinese People's Liberation Army              | Northern China  | Beijing   | Beijing   | Fakuan Tang, Jun<br>Xiao |
| 12 | Zhongda Hospital, Southeast University                              | Eastern China   | Jiangsu   | Nanjing   | Genshan Ma               |
| 13 | The First Affiliated Hospital of Liaoning Medical University        | Northeast China | Liaoning  | Jinzhou   | Guizhou Tao              |
| 14 | Xinjiang Uygur Autonomous Region People's Hospital                  | Northwest China | Xinjiang  | Urumchi   | Guoqing Li               |
| 15 | Sir Run Run Shaw Hospital, College of Medicine, Zhejiang University | Eastern China   | Zhejiang  | Hangzhou  | Guosheng Fu              |
| 16 | Beijing Friendship Hospital, Capital Medical University             | Northern China  | Beijing   | Beijing   | Hongwei Li               |
| 17 | The First Affiliated Hospital of Bengbu Medical College             | Eastern China   | Anhui     | Bengbu    | Hongju Wang,<br>Bi Tang  |
| 18 | General Hospital of TISCO                                           | Northern China  | Shanxi    | Taiyuan   | Huifeng Wang             |
| 19 | Dongguan People's Hospital                                          | Southern China  | Guangdong | Dongguan  | Jianfeng Ye              |
| 20 | Panyu Hospital of Chinese Medicine                                  | Southern China  | Guangdong | Guangzhou | Jianhao Li               |

|    |                                                                                |                 |           |           |                             |
|----|--------------------------------------------------------------------------------|-----------------|-----------|-----------|-----------------------------|
| 21 | Peking University First Hospital                                               | Northern China  | Beijing   | Beijing   | Jie Jiang                   |
| 22 | Sun Yat-sen Memorial Hospital, Sun Yat-sen University                          | Southern China  | Guangdong | Guangzhou | Jingfeng Wang               |
| 23 | Guangdong General Hospital                                                     | Southern China  | Guangdong | Guangzhou | Jiyan Chen                  |
| 24 | Hospital of Xinjiang Production & Construction Corps                           | Northwest China | Xinjiang  | Urumchi   | Junming Liu                 |
| 25 | The Military General Hospital of Beijing PLA                                   | Northern China  | Beijing   | Beijing   | Junxia Li                   |
| 26 | The First Affiliated Hospital of Guangxi Medical University                    | Southern China  | Guangxi   | Nanning   | Lang Li                     |
| 27 | Tongren Hospital Affiliated to Shanghai Jiaotong University School of Medicine | Eastern China   | Shanghai  | Shanghai  | Li Jiang                    |
| 28 | Binzhou City Center Hospital                                                   | Eastern China   | Shandong  | Binzhou   | Lijun Meng,<br>Junqiang Cao |
| 29 | The First Affiliated Hospital of Zhengzhou University                          | Central China   | Henan     | Zhengzhou | Ling Li                     |
| 30 | Xijing Hospital                                                                | Northwest China | Shaanxi   | Xi'an     | Ling Tao                    |
| 31 | The Affiliated Hospital of Guizhou Medical University                          | Southwest China | Guizhou   | Guiyang   | Lirong Wu                   |

|    |                                                                                |                 |         |          |                                |
|----|--------------------------------------------------------------------------------|-----------------|---------|----------|--------------------------------|
| 32 | First Affiliated Hospital of the People's Liberation Army<br>General Hospital  | Northern China  | Beijing | Beijing  | Miao Tian                      |
| 33 | The Second People's Hospital of Yunnan Province                                | Southwest China | Yunnan  | Kunming  | Minghua Han                    |
| 34 | Haikou People's Hospital                                                       | Southern China  | Hainan  | Haikou   | Moshui Chen                    |
| 35 | Gansu Provincial Hospital                                                      | Northwest China | Gansu   | Lanzhou  | Ping Xie                       |
| 36 | The First Affiliated Hospital of Henan University of<br>Science and Technology | Central China   | Henan   | Luoyang  | Pingshuan Dong,<br>Xuming Yang |
| 37 | Chenzhou First People's Hospital                                               | Central China   | Hunan   | Chenzhou | Qiaoqing Zhong,<br>Dajun Hu    |
| 38 | People's Hospital of Qinghai Province                                          | Northwest China | Qinghai | Xining   | Rong Chang,<br>Xiaoling Su     |
| 39 | Affiliated Hospital of Ningxia Medical University                              | Northwest China | Ningxia | Yinchuan | Shaobin Jia                    |
| 40 | Beijing Anzhen Hospital, Capital Medical University                            | Northern China  | Beijing | Beijing  | Shaoping Nie,<br>Xiaohui Liu,  |

|    |                                                               |                 |           |              |               |
|----|---------------------------------------------------------------|-----------------|-----------|--------------|---------------|
|    |                                                               |                 |           |              | Qiang Lv      |
| 41 | North Jiangsu People's Hospital                               | Eastern China   | Jiangsu   | Yangzhou     | Shenghu He    |
| 42 | Shanghai Sixth People's Hospital                              | Eastern China   | Shanghai  | Shanghai     | Shixin Ma     |
| 43 | The First Hospital of Handan                                  | Northern China  | Hebei     | Handan       | Shuanli Xin   |
| 44 | Huai'an First People's Hospital                               | Eastern China   | Jiangsu   | Huai'an      | Shuren Ma     |
| 45 | The First Affiliated Hospital of Chongqing Medical University | Southwest China | Chongqing | Chongqing    | Suxin Luo     |
| 46 | Navy General Hospital                                         | Northern China  | Beijing   | Beijing      | Tianchang Li  |
| 47 | Zhejiang Provincial Hospital of TCM                           | Eastern China   | Zhejiang  | Hangzhou     | Wei Mao       |
| 48 | The Third Xiangya Hospital of Central South University        | Central China   | Hunan     | Changsha     | Weihong Jiang |
| 49 | Affiliated Hospital of Qinghai University                     | Northwest China | Qinghai   | Xining       | Weijun Liu    |
| 50 | Teda International Cardiovascular Hospital                    | Northern China  | Tianjin   | Tianjin      | Wenhua Lin    |
| 51 | The Second Hospital of Hebei Medical University               | Northern China  | Hebei     | Shijiazhuang | Xianghua Fu   |
| 52 | Changhai Hospital of Shanghai                                 | Eastern China   | Shanghai  | Shanghai     | Xianxian Zhao |

|    |                                                            |                 |                   |              |                             |
|----|------------------------------------------------------------|-----------------|-------------------|--------------|-----------------------------|
| 53 | The Second Affiliated Hospital to Nanchang University      | Eastern China   | Jiangxi           | Nanchang     | Xiaoshu Cheng               |
| 54 | Hebei General Hospital                                     | Northern China  | Hebei             | Shijiazhuang | Xiaoyong Qi                 |
| 55 | Inner Mongolia People's Hospital                           | Northern China  | Inner<br>Mongolia | Hohhot       | Xingsheng Zhao              |
| 56 | The General Hospital of Shenyang Military Region           | Northeast China | Liaoning          | Shenyang     | Yaling Han                  |
| 57 | The First Hospital of Jilin University                     | Northeast China | Jilin             | Changchun    | Yang Zheng                  |
| 58 | Tianjin Chest Hospital                                     | Northern China  | Tianjin           | Tianjin      | Yin Liu                     |
| 59 | Hunan Provincial People's Hospital                         | Central China   | Hunan             | Changsha     | Ying Guo,<br>Jianqiang Peng |
| 60 | People's Hospital of Yuxi City                             | Southwest China | Yunnan            | Yuxi         | Yinglu Hao                  |
| 61 | The People's Hospital of Guangxi Zhuang Autonomous Region  | Southern China  | Guangxi           | Nanning      | Yingzhong Lin               |
| 62 | The First Teaching Hospital of Xinjiang Medical University | Northwest China | Xinjiang          | Urumchi      | Yitong Ma                   |



|    |                                                            |                 |                |              |              |
|----|------------------------------------------------------------|-----------------|----------------|--------------|--------------|
| 63 | Baogang Hospital                                           | Northern China  | Inner Mongolia | Baotou       | Yongdong Li  |
| 64 | Tianjin Medical University General Hospital                | Northern China  | Tianjin        | Tianjin      | Yuemin Sun   |
| 65 | The Second Affiliated Hospital of Zhengzhou University     | Central China   | Henan          | Zhengzhou    | Yulan Zhao   |
| 66 | Nanfang Hospital of Southern Medical University            | Southern China  | Guangdong      | Guangzhou    | Yuqing Hou   |
| 67 | The First Affiliated Hospital to Nanchang University       | Eastern China   | Jiangxi        | Nanchang     | Zeqi Zheng   |
| 68 | The First Affiliated Hospital of Lanzhou University        | Northwest China | Gansu          | Lanzhou      | Zheng Zhang  |
| 69 | The Third Hospital of Shijiazhuang                         | Northern China  | Hebei          | Shijiazhuang | Zhenguo Ji   |
| 70 | Wuxi People's Hospital                                     | Eastern China   | Jiangsu        | Wuxi         | Zhenyu Yang  |
| 71 | Jiangsu Province Hospital                                  | Eastern China   | Jiangsu        | Nanjing      | Zhijian Yang |
| 72 | The Second Hospital of Shanxi Medical University           | Northern China  | Shanxi         | Taiyuan      | Zhiming Yang |
| 73 | The Affiliated Hospital of Xuzhou Medical College          | Eastern China   | Jiangsu        | Xuzhou       | Zhirong Wang |
| 74 | Southwest Hospital, Third Military Medical University      | Southwest China | Chongqing      | Chongqing    | Zhiyuan Song |
| 75 | The First Affiliated Hospital of Xi'an Jiaotong University | Northwest China | Shaanxi        | Xi'an        | Zuyi Yuan    |

|    |                                                         |                 |              |           |                |
|----|---------------------------------------------------------|-----------------|--------------|-----------|----------------|
| 76 | Yangzhou First People's Hospital                        | Eastern China   | Jiangsu      | Yangzhou  | Aihua Li       |
| 77 | Hospital 463 of Chinese People's Liberation Army        | Northeast China | Liaoning     | Shenyang  | Bosong Yang    |
| 78 | The Central Hospital of Mianyang                        | Northwest China | Sichuan      | Mianyang  | Caidong Luo    |
| 79 | Liaocheng People's Hospital                             | Eastern China   | Shandong     | Liaocheng | Chunyan Zhang  |
| 80 | Yancheng Third People's Hospital                        | Eastern China   | Jiangsu      | Yancheng  | Chunyang Wu    |
| 81 | The Second Xiangya Hospital of Central South University | Central China   | Hunan        | Changsha  | Daoquan Peng   |
| 82 | The Central Hospital of Panzhihua                       | Northwest China | Sichuan      | Panzhihua | Dawen Xu       |
| 83 | The First Hospital of Qiqihar City                      | Northeast China | Heilongjiang | Qiqihar   | Gang Xu        |
| 84 | The Third the People's Hospital of Bengbu               | Eastern China   | Anhui        | Bengbu    | Gengsheng Sang |
| 85 | The First Hospital of Jiamusi                           | Northeast China | Heilongjiang | Jiamusi   | Guixia Zhang   |
| 86 | Zhoushan People's Hospital                              | Eastern China   | Zhejiang     | Zhoushan  | Guoxiong Chen  |
| 87 | Dalian Municipal Central Hospital                       | Northeast China | Liaoning     | Dalian    | Hailong Lin    |
| 88 | Renmin Hospital of Wuhan University                     | Central China   | Hubei        | Wuhan     | Hong Jiang     |
| 89 | Ningxia People's Hospital                               | Northwest China | Ningxia      | Yinchuan  | Hong Luan      |

|     |                                                                  |                 |              |            |              |
|-----|------------------------------------------------------------------|-----------------|--------------|------------|--------------|
| 90  | The First People's Hospital of Yunnan Province (Kunhua Hospital) | Southwest China | Yunnan       | Kunming    | Hong Zhang   |
| 91  | The Central Hospital of Zhoukou                                  | Central China   | Henan        | Zhoukou    | Hualing Liu  |
| 92  | Anyang District Hospital                                         | Central China   | Henan        | Anyang     | Hui Liu      |
| 93  | Sichuan Provincial People's Hospital                             | Northwest China | Sichuan      | Chengdu    | Jianhong Tao |
| 94  | Mudanjiang Cardiovascular Disease Hospital                       | Northeast China | Heilongjiang | Mudanjiang | Jianwen Liu  |
| 95  | Yichang Central Hospital                                         | Central China   | Hubei        | Yichang    | Jiawang Ding |
| 96  | Qilu Hospital of Shandong University                             | Eastern China   | Shandong     | Jinan      | Jifu Li      |
| 97  | Affiliated Hospital of Jiangsu University                        | Eastern China   | Jiangsu      | Zhenjiang  | Jinchuan Yan |
| 98  | The First People's Hospital of Nanning City                      | Southern China  | Guangxi      | Nanning    | Jinru Wei    |
| 99  | The First Affiliated Hospital of Fujian Medical University       | Eastern China   | Fujian       | Fuzhou     | Jinzi Su     |
| 100 | Chengdu Third People's Hospital                                  | Northwest China | Sichuan      | Chengdu    | Jiong Tang   |
| 101 | Yantaishan hospital                                              | Eastern China   | Shandong     | Yantai     | Juexin Fan   |
| 102 | Qingdao Municipal Hospital                                       | Eastern China   | Shandong     | Qingdao    | Jun Guan     |

|     |                                                                                      |                 |              |           |              |
|-----|--------------------------------------------------------------------------------------|-----------------|--------------|-----------|--------------|
| 103 | Zhongshan Hospital Affiliated to Fudan University                                    | Eastern China   | Shanghai     | Shanghai  | Junbo Ge     |
| 104 | Longyan First Hospital                                                               | Eastern China   | Fujian       | Longyan   | Kaihong Chen |
| 105 | Affiliated Hospital of Guangdong Medical College                                     | Southern China  | Guangdong    | Guangzhou | Keng Wu      |
| 106 | Jiangxi Provincial People's Hospital                                                 | Eastern China   | Jiangxi      | Nanchang  | Lang Ji      |
| 107 | Anhui Provincial Hospital                                                            | Eastern China   | Anhui        | Hefei     | Likun Ma     |
| 108 | Xiangtan City Central Hospital                                                       | Central China   | Hunan        | Xiangtan  | Lilong Tang  |
| 109 | The First Hospital of Haerbin City                                                   | Northeast China | Heilongjiang | Harbin    | Lin Wei      |
| 110 | Central Hospital Affiliated to Shenyang Medical College                              | Northeast China | Liaoning     | Shenyang  | Man Zhang    |
| 111 | The Central Hospital of Wuhan                                                        | Central China   | Hubei        | Wuhan     | Manhua Chen  |
| 112 | Hangzhou First People's Hospital                                                     | Eastern China   | Zhejiang     | Hangzhou  | Ningfu Wang  |
| 113 | The Central Hospital of Xuzhou                                                       | Eastern China   | Jiangsu      | Xuzhou    | Bing Han     |
| 114 | The Second hospital of Dalian Medical University                                     | Northeast China | Liaoning     | Dalian    | Peng Qu      |
| 115 | The First Affiliated Hospital of Liaoning University of Traditional Chinese Medicine | Northeast China | Liaoning     | Shenyang  | Ping Hou     |

|     |                                                             |                 |           |           |                          |
|-----|-------------------------------------------------------------|-----------------|-----------|-----------|--------------------------|
| 116 | Beijing Tsinghua Changgung Hospital                         | Northern China  | Beijing   | Beijing   | Ping Zhang               |
| 117 | Guizhou Provincial People's Hospital                        | Southwest China | Guizhou   | Guiyang   | Qiang Wu                 |
| 118 | The First Affiliated Hospital of Xiamen University          | Eastern China   | Fujian    | Xiamen    | Qiang Xie                |
| 119 | Quanzhou First Hospital                                     | Eastern China   | Fujian    | Quanzhou  | Rong Lin                 |
| 120 | Wuzhou People's Hospital                                    | Southern China  | Guangxi   | Wuzhou    | Shaowu Ye,<br>Zhaohua Lu |
| 121 | The Central Hospital of Jilin                               | Northeast China | Jilin     | Changchun | Shuangbin Li             |
| 122 | Xiangya Hospital Central South University                   | Central China   | Hunan     | Changsha  | Tianlun Yang             |
| 123 | Guangzhou Red Cross Hospital                                | Southern China  | Guangdong | Guangzhou | Tongguo Wu               |
| 124 | The First Affiliated Hospital of Guangzhou Medical College  | Southern China  | Guangdong | Guangzhou | Wei Wang                 |
| 125 | The First Affiliated Hospital of Wenzhou Medical University | Eastern China   | Zhejiang  | Wenzhou   | Weijian Huang            |
| 126 | The Second Affiliated Hospital of Soochow University        | Eastern China   | Jiangsu   | Suzhou    | Weiting Xu               |

|     |                                                            |                 |           |           |                |
|-----|------------------------------------------------------------|-----------------|-----------|-----------|----------------|
| 127 | Wuhan Asia Heart Hospital                                  | Central China   | Hubei     | Wuhan     | Xi Su          |
| 128 | The First Affiliated Hospital of Soochow University        | Eastern China   | Jiangsu   | Suzhou    | Xiangjun Yang  |
| 129 | Affiliated Hospital of Yan'an University                   | Northwest China | Shaanxi   | Yan'an    | Xiaochuan Ma   |
| 130 | The First People's Hospital of Jining                      | Eastern China   | Shandong  | Jining    | Xiaofei Sun    |
| 131 | The Central Hospital of Taiyuan                            | Northern China  | Shanxi    | Taiyuan   | Xiaoping Chen  |
| 132 | West China Hospital of Sichuan University                  | Northwest China | Sichuan   | Chengdu   | Xiaoping Chen  |
| 133 | The Third Affiliated Hospital of Guangzhou Medical College | Southern China  | Guangdong | Guangzhou | Ximing Chen    |
| 134 | The First Affiliated Hospital of Wannan Medical College    | Eastern China   | Anhui     | Wuhu      | Xingsheng Tang |
| 135 | Tangdu Hospital of The Fourth Military Medical University  | Northwest China | Shaanxi   | Xi'an     | Xue Li         |
| 136 | Shanghai East Hospital Affiliated to Tongji University     | Eastern China   | Shanghai  | Shanghai  | Xuebo Liu      |
| 137 | Xiamen Cardiovascular Disease Hospital                     | Eastern China   | Fujian    | Xiamen    | Yan Wang       |
| 138 | Zhongnan hospital of Wuhan University                      | Central China   | Hubei     | Wuhan     | Yanggan Wang   |

|     |                                                            |                 |              |          |                           |
|-----|------------------------------------------------------------|-----------------|--------------|----------|---------------------------|
| 139 | Fujian Provincial Hospital                                 | Eastern China   | Fujian       | Fuzhou   | Yansong Guo               |
| 140 | The First Affiliated hospital of Dalian Medical University | Northeast China | Liaoning     | Dalian   | Yanzong Yang              |
| 141 | The First People's Hospital of Changde                     | Central China   | Hunan        | Changde  | Yi Huang,<br>Liangqing Ge |
| 142 | The First Affiliated Hospital of China Medical University  | Northeast China | Liaoning     | Shenyang | Yingxian Sun              |
| 143 | The Fourth Affiliated Hospital of China Medical University | Northeast China | Liaoning     | Shenyang | Yuanzhe Jin               |
| 144 | Cangzhou Central Hospital                                  | Northern China  | Hebei        | Cangzhou | Zesheng Xu                |
| 145 | The Central Hospital of Shaoyang                           | Central China   | Hunan        | Shaoyang | Zewei Ouyang              |
| 146 | The People's Hospital of Liaoning Province                 | Northeast China | Liaoning     | Shenyang | Zhanquan Li               |
| 147 | The First Affiliated Hospital of Jiamusi University        | Northeast China | Heilongjiang | Jiamusi  | Zhaofa He                 |
| 148 | Tangshan Gongren Hospital                                  | Northern China  | Hebei        | Tangshan | Zheng Ji                  |
| 149 | Huaibei Miners General Hospital                            | Eastern China   | Anhui        | Huaibei  | Zhenqi Su                 |
| 150 | Linyi People's Hospital                                    | Eastern China   | Shandong     | Linyi    | Zhihong Ou                |

|     |                                                    |                 |           |           |               |
|-----|----------------------------------------------------|-----------------|-----------|-----------|---------------|
| 151 | Chongqing Hechuan District People's Hospital       | Southwest China | Chongqing | Chongqing | Xin Tang      |
| 152 | Yuzhou City Central Hospital                       | Central China   | Henan     | Xuchang   | Qinfeng Su    |
| 153 | Jianshui County People's Hospital                  | Southwest China | Yunnan    | Honghe    | Weiqing Fan   |
| 154 | Dunhua City Hospital                               | Northeast China | Jilin     | Dunhua    | Fanju Meng    |
| 155 | Shenyang City Electricity Central Hospital         | Northeast China | Liaoning  | Shenyang  | Jing Xu       |
| 156 | Shanghai Jingan District Shibe Hospital            | Eastern China   | Shanghai  | Shanghai  | Bin Wang      |
| 157 | Beijing Fangshan District First Hospital           | Northern China  | Beijing   | Beijing   | Xuemei Peng   |
| 158 | Hebei Daming County People's Hospital              | Northern China  | Hebei     | Handan    | Haiping Guo   |
| 159 | Jiangsu Binhai County People's Hospital            | Eastern China   | Jiangsu   | Yancheng  | Yonglin Zhang |
| 160 | The First People's Hospital of Longquanyi District | Southwest China | Sichuan   | Chengdu   | Wei Tuo       |
| 161 | Guangxi Hengxian County People's Hospital          | Southern China  | Guangxi   | Nanning   | Xianan Zhang  |
| 162 | Hunan Changsha County First People's Hospital      | Central China   | Hunan     | Changsha  | Siding Wang   |
| 163 | People's Hospital of Wugang                        | Central China   | Hunan     | Shaoyang  | JiaoMei Yang  |
| 164 | Longhui County People's Hospital                   | Central China   | Hunan     | Shaoyang  | Xiaojun Wang  |



|     |                                                               |                 |                |           |               |
|-----|---------------------------------------------------------------|-----------------|----------------|-----------|---------------|
| 165 | Heilongjiang Fujin City Central Hospital                      | Northeast China | Heilongjiang   | Jiamusi   | Jiyan Yin     |
| 166 | Dalian Fourth People's Hospital                               | Northeast China | Liaoning       | Dalian    | Huifang Zhang |
| 167 | General Hospital of Guangzhou Military Command                | Southern China  | Guangdong      | Guangzhou | Yanlie Zheng  |
| 168 | The First People's Hospital of Horqin District, Tongliao City | Northern China  | Inner Mongolia | Tongliao  | Junping Fang  |
| 169 | Guiyang Sixth People's Hospital                               | Southwest China | Guizhou        | Guiyang   | Kalan Luo     |
| 170 | Geological Mining Hospital of Hunan Province                  | Central China   | Hunan          | Changsha  | Naiyi Liang   |
| 171 | Zhangzhou Municipal Hospital of Fujian Province               | Eastern China   | Fujian         | Zhangzhou | Changyong Liu |
| 172 | Jining City Yanzhou District People's Hospital                | Eastern China   | Shandong       | Jining    | Jian Yang     |
| 173 | The People's Hospital Feixian                                 | Eastern China   | Shandong       | Linyi     | Honghua Deng  |
| 174 | Tangshan City Fengrun District People's Hospital              | Northern China  | Hebei          | Tangshan  | Lin Wang      |
| 175 | Qian'an People's Hospital                                     | Northern China  | Hebei          | Tangshan  | Yuheng Yang   |
| 176 | Yuzhong County People's Hospital                              | Northwest China | Gansu          | Lanzhou   | Xiaowei Peng  |
| 177 | Baiyin Cite Center Hospital                                   | Northwest China | Gansu          | Baiyin    | Fang Zhao     |

|     |                                                              |                 |                   |            |                             |
|-----|--------------------------------------------------------------|-----------------|-------------------|------------|-----------------------------|
| 178 | Mingguang People's Hospital                                  | Eastern China   | Anhui             | Chuzhou    | Yong Li                     |
| 179 | Xihua County People's Hospital                               | Central China   | Henan             | Zhoukou    | Chuntong Wang               |
| 180 | Zhalantun People's Hospital                                  | Northern China  | Inner<br>Mongolia | Hulunbeier | Yuhua Zhu                   |
| 181 | Fengrun District Second People's Hospital                    | Northern China  | Hebei             | Tangshan   | Jingshan Zhao,<br>Hua Jiang |
| 182 | Zhangping City Hospital                                      | Eastern China   | Fujian            | Zhangpin   | Jinxing Yi                  |
| 183 | Fuqing Cite Hospital                                         | Eastern China   | Fujian            | Fuqing     | Ping Chen                   |
| 184 | The Eight Affiliated Hospital, Sun Yat-sen University        | Southern China  | Guangdong         | Guangzhou  | Nan Jia                     |
| 185 | The Second Affiliated Hospital of Qiqihar Medical University | Northeast China | Heilongjiang      | Qiqihar    | Yanli Wang                  |
| 186 | Wuhan University of Science and Technology Hospital          | Central China   | Hubei             | Wuhan      | Jing Hu                     |
| 187 | Baotou City Center Hospital                                  | Northern China  | Inner<br>Mongolia | Baotou     | Ruiping Zhao                |

|     |                                                    |                 |              |           |                  |
|-----|----------------------------------------------------|-----------------|--------------|-----------|------------------|
| 188 | Shanghai Jiading District Center Hospital          | Eastern China   | Shanghai     | Shanghai  | Xia Chen         |
| 189 | Datong City Second People's Hospital               | Northern China  | Shanxi       | Datong    | Xiaoqin Zhang    |
| 190 | Binyang People's Hospital                          | Southern China  | Guangxi      | Binyang   | Fudong Gan       |
| 191 | Deqing People's Hospital                           | Eastern China   | Zhejiang     | Deqing    | Fangfang Huang   |
| 192 | Xinmi people's hospital                            | Central China   | Henan        | Xinmi     | Xiaolei Li       |
| 193 | Dongguan Changping hospital                        | Southern China  | Guangdong    | Dongguan  | Haiyun Lin       |
| 194 | Gongyi people's hospital                           | Central China   | Henan        | Gongyi    | Tianmin Du       |
| 195 | Ye County people's hospital                        | Central China   | Henan        | Yexian    | Jie Yang         |
| 196 | The second people's hospital of Mengcheng          | Eastern China   | Anhui        | Mengcheng | Pengfei Zhang    |
| 197 | Nanpi People's Hospital                            | Northern China  | Hebei        | Nanpi     | Hui Dong         |
| 198 | Shimen People's Hospital                           | Central China   | Hunan        | Shimeng   | Chuanliang Liang |
| 199 | Tieli People's Hospital                            | Northeast China | Heilongjiang | Tieli     | Yanbo Niu        |
| 200 | Sihui People's Hospital                            | Southern China  | Guangdong    | Sihui     | Yuehua Huang     |
| 201 | Chest Hospital of Xinjiang Uygur Autonomous Region | Northwest China | Xinjiang     | Urumchi   | Dongsheng Chai   |

|     |                                                    |                 |              |           |                 |
|-----|----------------------------------------------------|-----------------|--------------|-----------|-----------------|
| 202 | Beian First People's Hospital                      | Northeast China | Heilongjiang | Bei'an    | Dongyan Li      |
| 203 | Zunhua People's Hospital                           | Northern China  | Hebei        | Zunhua    | Xiaoli Yang     |
| 204 | Lujiang People's Hospital                          | Eastern China   | Anhui        | Lujiang   | Qichun Wang     |
| 205 | Qinyang People's Hospital                          | Central China   | Henan        | Qinyang   | Xiaowen Ma      |
| 206 | Longmen People's Hospital                          | Southern China  | Guangdong    | Longmen   | Yingchao Luo    |
| 207 | Quyang Renji Hospital                              | Northern China  | Hebei        | Quyang    | Congliang Zhang |
| 208 | Nenjiang People's Hospital                         | Northeast China | Heilongjiang | Nenjiang  | Shuhua Zhang    |
| 209 | Longjiang First People's Hospital                  | Northeast China | Heilongjiang | Longjiang | Yuhuan Shi      |
| 210 | Li County Hospital of Traditional Chinese Medicine | Central China   | Hunan        | Changde   | Songbai Li      |
| 211 | Luan County People's Hospital                      | Northern China  | Hebei        | Luanxian  | Guo Li          |
| 212 | Yulong Hospital                                    | Southwest China | Yunnan       | Yulong    | Zeyuan He       |
| 213 | Huining People's Hospital                          | Northwest China | Gansu        | Huining   | Jiabin Xi       |
| 214 | Yuncheng Hospital                                  | Eastern China   | Shandong     | Yuncheng  | Jinglan Diao    |
| 215 | Hepu People's Hospital                             | Southern China  | Guangxi      | Hepu      | Meisheng Lai    |

|     |                                                                   |                 |              |           |                |
|-----|-------------------------------------------------------------------|-----------------|--------------|-----------|----------------|
| 216 | Duzishan Petrochemical Hospital                                   | Northwest China | Xinjiang     | Dushanzi  | Shuqiu Qu      |
| 217 | Guiding People's Hospital                                         | Southwest China | Guizhou      | Guiding   | Guoduo Chen    |
| 218 | People's Hospital of Rongchang District                           | Southwest China | Chongqing    | Chongqing | Jie Chen       |
| 219 | Ningbo First Hospital                                             | Eastern China   | Zhejiang     | Ningbo    | Huimin Chu     |
| 220 | Ledong Second People's Hospital                                   | Southern China  | Hainan       | Ledong    | Xiufeng Chen   |
| 221 | Guang'an People's Hospital                                        | Southwest China | Sichuan      | Guang'an  | Tian Tuo       |
| 222 | Linfen People's Hospital                                          | Northern China  | Shanxi       | Linfen    | Junping Deng   |
| 223 | People's Hospital of Bozhou District                              | Southwest China | Guizhou      | Zunyi     | Shengyong Chen |
| 224 | Dianjiang People's Hospital                                       | Southwest China | Chongqing    | Dianjiang | Yang Yu        |
| 225 | First Affiliated Hospital of Harbin Medical University.           | Northeast China | Heilongjiang | Harbin    | Yue Li         |
| 226 | Yiliang Hospital                                                  | Southwest China | Yunnan       | Yiliang   | Liqiong Yang   |
| 227 | Haidong Ping'an District Hospital of Traditional Chinese Medicine | Northwest China | Qinghai      | Haidong   | Guoqin Xin     |
| 228 | Ningjin People's Hospital                                         | Eastern China   | Shandong     | Ningjin   | Tao Zhang      |

|     |                                                                       |                 |          |          |                |
|-----|-----------------------------------------------------------------------|-----------------|----------|----------|----------------|
| 229 | Yutian Hospital                                                       | Northern China  | Hebei    | Yutian   | Xiaoyun Feng   |
| 230 | Yanting People's Hospital                                             | Southwest China | Sichuan  | Yanting  | Mingcheng Bai  |
| 231 | The Fourth Affiliated Hospital Zhejiang University School of Medicine | Eastern China   | Zhejiang | Yiwu     | Shudong Xia    |
| 232 | Wuxi Xishan People's Hospital                                         | Eastern China   | Jiangsu  | Wuxi     | Xudong Li      |
| 233 | Dongfeng Hospital                                                     | Northeast China | Jilin    | Dongfeng | Wei Liu        |
| 234 | Zhijin People's Hospital                                              | Southwest China | Guizhou  | Zhijin   | Zhongshan Wang |
| 235 | Huaiyang People's Hospital                                            | Central China   | Henan    | Huaiyang | Li Wei         |
| 236 | Suizhou Central Hospital                                              | Central China   | Hubei    | Suizhou  | Fengwei Li     |
| 237 | Tonglu First People's Hospital                                        | Eastern China   | Zhejiang | Tonglu   | Xiaolan Li     |
| 238 | Xiantao First People's Hospital                                       | Central China   | Hubei    | Xiantao  | Dongmei Zhu    |
| 239 | Honghu People's Hospital                                              | Central China   | Hubei    | Honghu   | Hong Liu       |
| 240 | Xinjin County Hospital of Traditional Chinese Medicine                | Northwest China | Sichuan  | Xinjin   | Yingbi Su      |

CCC-ACS: The Improving Care for Cardiovascular Disease in China-Acute Coronary Syndrome

## Supplementary Figures

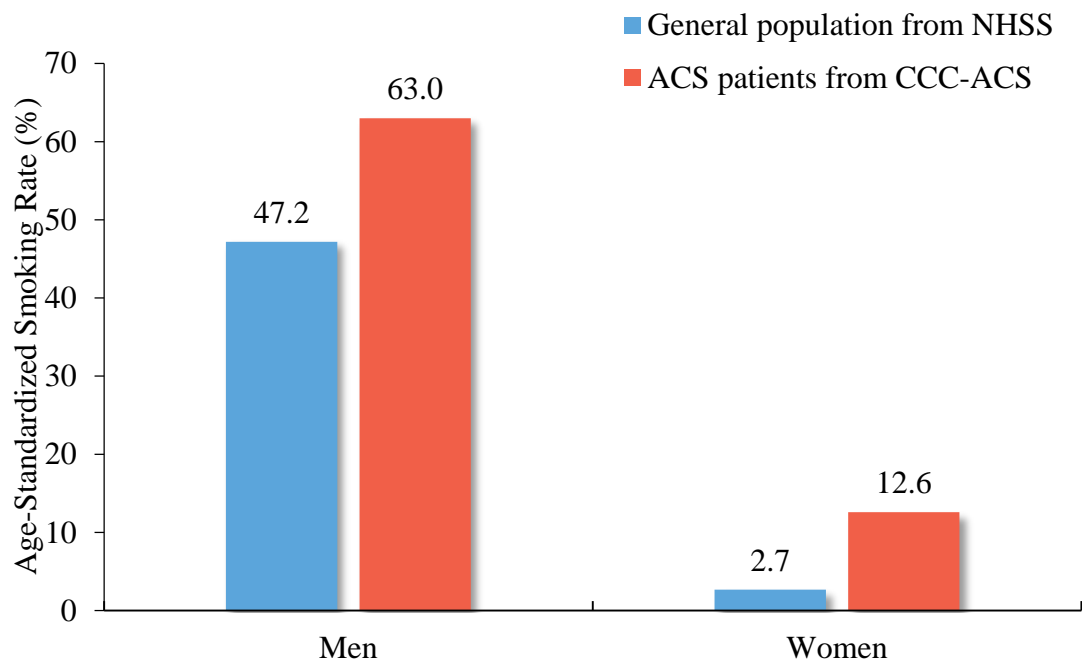

Supplementary Figure 1 Comparison of age-standardized smoking prevalence between ACS patients and the general population by sex

(Smoking prevalence was standardized using the age distribution of the general Chinese population obtained from the 2010 National Population Census [7])

Comparison of age-standardized smoking prevalence between acute coronary syndrome patients from CCC-ACS project and the general population from NHSS [8]. ACS: acute coronary syndrome; CCC-ACS: The Improving Care for Cardiovascular Disease in China-Acute Coronary Syndrome; NHSS: National Health Services Survey.

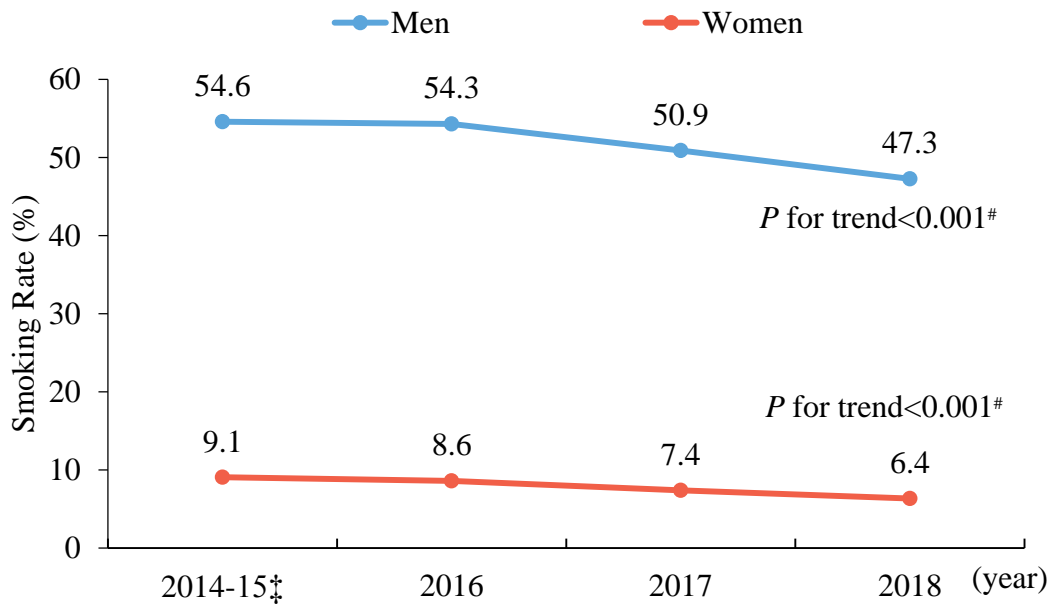

Supplementary Figure 2 Trends in smoking prevalence among ACS patients

‡ Since the project started in November 2014 and the data sample collected in 2014 is relatively small, we have merged data from 2014 and 2015.

Trends in smoking prevalence displayed by year from 2014 to 2018 for male acute coronary syndrome patients (blue) and female acute coronary syndrome patients (red). ACS: acute coronary syndrome.

# Cochran-Armitage trend test



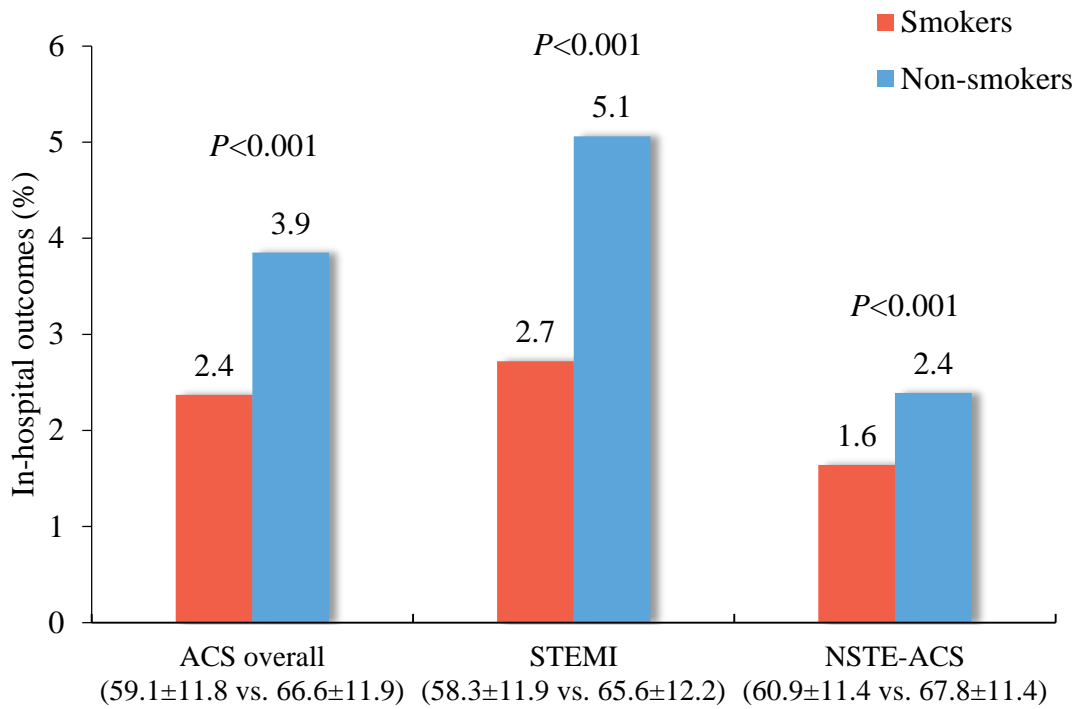

Supplementary Figure 3 In-hospital outcomes of smokers and non-smokers among patients with ACS (overall), STEMI, and NSTEMI-ACS

In-hospital outcomes according to smoking status among all patients with acute coronary syndrome, and among patients with specific subtypes of acute coronary syndrome. ACS: acute coronary syndrome; NSTEMI-ACS: non-ST-elevation acute coronary syndrome; STEMI: ST-elevation myocardial infarction

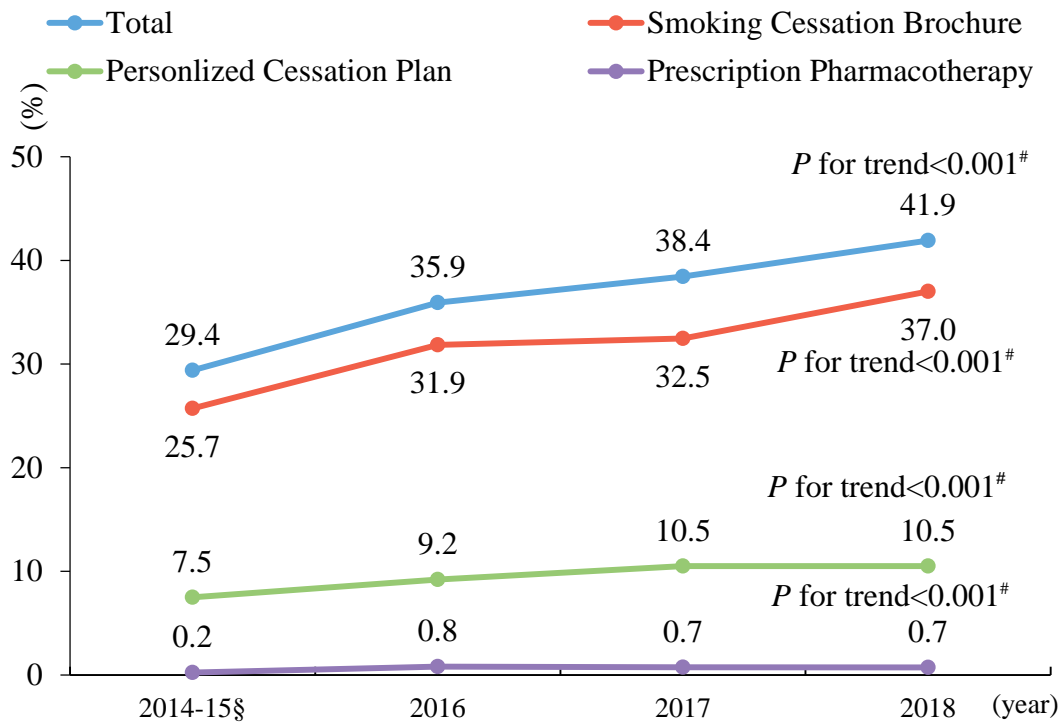

Supplementary Figure 4 Trends in proportions of patients receiving different smoking cessation interventions

§ Since the project started in November 2014 and the data sample collected in 2014 is relatively small, we have merged data from 2014 and 2015.

Trends in proportions of smoking patients receiving different smoking cessation interventions by year from 2014 to 2018.

# Cochran-Armitage trend test

## Supplementary References

1. **O'Gara PT, Kushner FG, Ascheim DD, et al.** 2013 ACCF/AHA guideline for the management of ST-elevation myocardial infarction: a report of the American College of Cardiology Foundation/American Heart Association Task Force on Practice Guidelines. *J Am Coll Cardiol.* 2013;61(4):e78-e140. DOI: <http://dx.doi.org/10.1016/j.jacc.2012.11.019>
2. **Amsterdam EA, Wenger NK, Brindis RG, et al.** 2014 AHA/ACC Guideline for the Management of Patients with Non-ST-Elevation Acute Coronary Syndromes: a report of the American College of Cardiology/American Heart Association Task Force on Practice Guidelines. *J Am Coll Cardiol.* 2014;64(24):e139-e228. DOI: <http://dx.doi.org/10.1016/j.jacc.2014.09.017>
3. **Ibanez B, James S, Agewall S, et al.** 2017 ESC Guidelines for the management of acute myocardial infarction in patients presenting with ST-segment elevation: The Task Force for the management of acute myocardial infarction in patients presenting with ST-segment elevation of the European Society of Cardiology (ESC). *Eur Heart J.* 2018;39(2):119-77. DOI: <http://dx.doi.org/10.1093/eurheartj/ehx393>
4. **Roffi M, Patrono C, Collet JP, et al.** 2015 ESC Guidelines for the management of acute coronary syndromes in patients presenting without persistent ST-segment elevation: Task Force for the Management of Acute Coronary Syndromes in Patients Presenting without Persistent ST-Segment Elevation of the European Society of Cardiology (ESC). *Eur Heart J.* 2016;37(3):267-315. DOI: <http://dx.doi.org/10.1093/eurheartj/ehv320>

5. **Levey AS, Stevens LA, Schmid CH, et al.** A new equation to estimate glomerular filtration rate. *Ann Intern Med.* 2009;150(9):604-12. DOI: <http://dx.doi.org/10.7326/0003-4819-150-9-200905050-00006>
6. **Chinese Society of Cardiology.** [Chinese guidelines for the diagnosis and treatment of heart failure 2014]. *Chin J Cardiol.* 2014;42(2):98-122. DOI: <http://dx.doi.org/10.3760/cma.j.issn.0253-3758.2014.02.004>
7. **National Bureau of Statistics.** Tabulation on the 2010 Population Census of the People's Republic of China. <http://www.stats.gov.cn/tjsj/pcsj/rkpc/6rp/indexch.htm> (accessed 10 January 2020).
8. **Wang M, Luo X, Xu S, et al.** Trends in smoking prevalence and implication for chronic diseases in China: serial national cross-sectional surveys from 2003 to 2013. *Lancet Respir Med.* 2019;7(1):35-45. DOI: [http://dx.doi.org/10.1016/s2213-2600\(18\)30432-6](http://dx.doi.org/10.1016/s2213-2600(18)30432-6)
